# Supplementary material for: Non-Invasive Detection of Anti-Inflammatory Bioactivity and Key Chemical Indicators of the Commercial Lanqin Oral Solution by Near Infrared Spectroscopy
Source: MDPI journal article supplement (doi:10.3390/molecules27092955), 2022-05-05
Supplement: s1 [file s1]

## Supplementary Materials

# Non-Invasive Detection of Anti-Inflammatory Bioactivity and Key Chemical Indicators of the Commercial Lanqin Oral Solution by Near Infrared Spectroscopy

Hui Ma, Lulu Xiao, Dongchen Xu, Yingrui Geng, Xuesong Liu, Yong Chen \* and Yongjiang Wu \*

College of Pharmaceutical Sciences, Zhejiang University, Hangzhou 310058, China;  
12119013@zju.edu.cn (H.M.); 22119162@zju.edu.cn (L.X.); xdcgg@zju.edu.cn (D.X.); 22019084@zju.edu.cn (Y.G.);  
liuxuesong@zju.edu.cn (X.L.)

\* Correspondence: chenrong1@zju.edu.cn (Y.C.); yjwu@zju.edu.cn (Y.W.)

**Table S1.** Sample production batches and dilution arrangements.

| Sample number | Production batch | Dilution factor * | Sample number | Production batch | Dilution factor * |
|---------------|------------------|-------------------|---------------|------------------|-------------------|
| 1             | 19070182         | 1                 | 52            | 21022081         | 1                 |
| 2             | 19070281         | 2.08              | 53            | 21021482         | 2.62              |
| 3             | 19070282         | 1.03              | 54            | 21022281         | 1.57              |
| 4             | 19070481         | 1                 | 55            | 21022282         | 1                 |
| 5             | 19070581         | 2.05              | 56            | 21022481         | 1.42              |
| 6             | 19070681         | 1                 | 57            | 21022582         | 1                 |
| 7             | 19070881         | 2.14              | 58            | 21022581         | 2.53              |
| 8             | 19070882         | 1.09              | 59            | 21022681         | 1.63              |
| 9             | 19070982         | 1                 | 60            | 21022782         | 1                 |
| 10            | 19071181         | 1.96              | 61            | 21022781         | 2.71              |
| 11            | 19071281         | 1                 | 62            | 21030181         | 1.36              |
| 12            | 19071282         | 2.2               | 63            | 21030281         | 1                 |
| 13            | 19071381         | 1.15              | 64            | 21030282         | 2.47              |
| 14            | 19071582         | 1                 | 65            | 21030381         | 1.69              |
| 15            | 19071681         | 2.98              | 66            | 21030481         | 1                 |
| 16            | 19071682         | 1.9               | 67            | 21030482         | 2.77              |
| 17            | 19071782         | 1                 | 68            | 21030581         | 1.3               |
| 18            | 19071881         | 2.26              | 69            | 21030681         | 1                 |
| 19            | 19071882         | 1.21              | 70            | 21030682         | 2.41              |
| 20            | 19072081         | 1                 | 71            | 21030881         | 1.75              |
| 21            | 19072082         | 2.92              | 72            | 21031081         | 1                 |
| 22            | 19072282         | 1.84              | 73            | 21031082         | 2.83              |
| 23            | 19072382         | 1                 | 74            | 21031181         | 1.24              |
| 24            | 19072581         | 2.32              | 75            | 21031281         | 1                 |
| 25            | 19072582         | 1.27              | 76            | 21031282         | 2.35              |
| 26            | 19072682         | 1                 | 77            | 21031381         | 1.81              |
| 27            | 19072781         | 2.86              | 78            | 21031581         | 1                 |
| 28            | 19072782         | 1.78              | 79            | 21031582         | 2.89              |
| 29            | 19072982         | 1                 | 80            | 21031781         | 1.48              |
| 30            | 19073081         | 2.38              | 81            | 21031881         | 1                 |
| 31            | 19073181         | 1.33              | 82            | 21031882         | 2.29              |
| 32            | 19080281         | 1                 | 83            | 21070681         | 1.87              |
| 33            | 19080282         | 2.8               | 84            | 21070781         | 1                 |

|    |          |      |     |          |      |
|----|----------|------|-----|----------|------|
| 34 | 19080381 | 1.72 | 85  | 21070782 | 2.95 |
| 35 | 19080481 | 1    | 86  | 21070881 | 1.18 |
| 36 | 19080581 | 2.44 | 87  | 21070981 | 1    |
| 37 | 19080682 | 1.39 | 88  | 21070982 | 2.23 |
| 38 | 19080782 | 1    | 89  | 21071081 | 1.93 |
| 39 | 19080881 | 2.74 | 90  | 20123131 | 1.06 |
| 40 | 19080982 | 1.66 | 91  | 21072981 | 1    |
| 41 | 19081081 | 1    | 92  | 21073081 | 3.01 |
| 42 | 19081282 | 1.45 | 93  | 21080181 | 1.12 |
| 43 | 21021481 | 1    | 94  | 21081082 | 1    |
| 44 | 21021582 | 2.68 | 95  | 21081181 | 2.17 |
| 45 | 21021581 | 1.6  | 96  | 21080881 | 1.99 |
| 46 | 21021682 | 1    | 97  | 21080982 | 1    |
| 47 | 21021781 | 2.56 | 98  | 21081282 | 3.07 |
| 48 | 21021782 | 1.51 | 99  | 21081381 | 2.02 |
| 49 | 21021882 | 1    | 100 | 21081781 | 1    |
| 50 | 21021981 | 2.59 | 101 | 21081782 | 2.11 |
| 51 | 21021982 | 1.54 |     |          |      |

---

\* 1 means no dilution is done.

**Table S2.** Performance of different spectral pretreatments models for 4 indexes under standard conditions.

| Analytes    | Pretreatment         | LVs       | Rc            | RMSEC        | RSEC         | Rp            | RMSEP        | RSEP         | RPD         |
|-------------|----------------------|-----------|---------------|--------------|--------------|---------------|--------------|--------------|-------------|
| ANTI-NO     | Raw                  | 6         | 0.9305        | 0.059        | 9.1%         | 0.9039        | 0.068        | 10.6%        | 2.68        |
|             | <b>Normalization</b> | <b>10</b> | <b>0.9491</b> | <b>0.051</b> | <b>7.8%</b>  | <b>0.9181</b> | <b>0.063</b> | <b>9.8%</b>  | <b>2.90</b> |
|             | SNV                  | 5         | 0.9315        | 0.059        | 9.0%         | 0.9062        | 0.067        | 10.5%        | 2.79        |
|             | SG smoothing         | 6         | 0.9302        | 0.059        | 9.1%         | 0.9060        | 0.067        | 10.5%        | 2.71        |
|             | MSC                  | 5         | 0.9316        | 0.059        | 9.0%         | 0.9059        | 0.067        | 10.5%        | 2.79        |
| Epigotritin | Raw                  | 10        | 0.8989        | 0.006        | 15.8%        | 0.9193        | 0.005        | 15.1%        | 2.55        |
|             | Normalization        | 10        | 0.9056        | 0.006        | 15.3%        | 0.9142        | 0.006        | 15.6%        | 2.47        |
|             | SNV                  | 10        | 0.9100        | 0.006        | 15.0%        | 0.9103        | 0.006        | 15.9%        | 2.42        |
|             | <b>SG smoothing</b>  | <b>8</b>  | 0.9119        | <b>0.006</b> | <b>14.8%</b> | <b>0.9218</b> | <b>0.005</b> | <b>14.9%</b> | <b>2.58</b> |
|             | MSC                  | 10        | 0.9084        | 0.006        | 15.1%        | 0.9245        | 0.005        | 14.6%        | 2.63        |
| Geniposide  | Raw                  | 17        | 0.9802        | 0.303        | 7.7%         | 0.9774        | 0.333        | 8.8%         | 4.73        |
|             | Normalization        | 16        | 0.9799        | 0.304        | 7.8%         | 0.9739        | 0.357        | 9.5%         | 4.44        |
|             | SNV                  | 13        | 0.9737        | 0.348        | 8.9%         | 0.9728        | 0.364        | 9.7%         | 4.35        |
|             | SG smoothing         | 10        | 0.9737        | 0.348        | 8.9%         | 0.9650        | 0.412        | 10.9%        | 3.83        |
|             | <b>MSC</b>           | <b>15</b> | 0.9803        | <b>0.302</b> | <b>7.7%</b>  | <b>0.9787</b> | <b>0.323</b> | <b>8.6%</b>  | <b>4.87</b> |
| Baicalin    | Raw                  | 4         | 0.9265        | 0.209        | 13.6%        | 0.8813        | 0.335        | 19.9%        | 2.16        |
|             | <b>Normalization</b> | <b>3</b>  | <b>0.9203</b> | <b>0.217</b> | <b>14.1%</b> | <b>0.8986</b> | <b>0.311</b> | <b>18.5%</b> | <b>2.33</b> |
|             | SNV                  | 5         | 0.9351        | 0.196        | 12.8%        | 0.8741        | 0.345        | 20.5%        | 2.12        |
|             | SG smoothing         | 5         | 0.9284        | 0.206        | 13.4%        | 0.8561        | 0.367        | 21.8%        | 1.97        |
|             | MSC                  | 5         | 0.9350        | 0.197        | 12.8%        | 0.8739        | 0.345        | 20.5%        | 2.12        |

**Table S3.** Performance of different variable selection models for 4 indexes under standard conditions.

| Analytes   | V. S. M. <sup>1</sup> | V. N. <sup>2</sup> | LVs       | Rc            | RMSEC        | RSEC         | Rp            | RMSEP        | RSEP         | RPD         |
|------------|-----------------------|--------------------|-----------|---------------|--------------|--------------|---------------|--------------|--------------|-------------|
| ANTI-NO    | CARS                  | 71                 | 10        | 0.9594        | 0.046        | 7.0%         | 0.9046        | 0.068        | 10.6%        | 2.52        |
|            | SIPLS                 | 311                | 7         | 0.9361        | 0.057        | 8.7%         | 0.8896        | 0.072        | 11.3%        | 2.40        |
|            | <b>RF</b>             | <b>290</b>         | <b>9</b>  | <b>0.9526</b> | <b>0.049</b> | <b>7.6%</b>  | <b>0.9296</b> | <b>0.058</b> | <b>9.1%</b>  | <b>3.20</b> |
| Epigoitrin | CARS                  | 62                 | 7         | 0.9328        | 0.005        | 13.0%        | 0.9213        | 0.005        | 14.9%        | 2.62        |
|            | SIPLS                 | 310                | 5         | 0.8901        | 0.006        | 16.4%        | 0.9298        | 0.005        | 14.1%        | 2.72        |
|            | <b>RF</b>             | <b>250</b>         | <b>8</b>  | <b>0.9434</b> | <b>0.005</b> | <b>12.0%</b> | <b>0.9439</b> | <b>0.005</b> | <b>12.7%</b> | <b>3.09</b> |
| Geniposide | CARS                  | 34                 | 10        | 0.9745        | 0.342        | 8.7%         | 0.9573        | 0.455        | 12.1%        | 3.47        |
|            | <b>SIPLS</b>          | <b>345</b>         | <b>13</b> | 0.9820        | <b>0.289</b> | <b>7.4%</b>  | <b>0.9791</b> | <b>0.320</b> | <b>8.5%</b>  | <b>4.95</b> |
|            | RF                    | 250                | 10        | 0.9648        | 0.402        | 10.2%        | 0.9748        | 0.351        | 9.3%         | 4.49        |
| Baicalin   | <b>CARS</b>           | <b>47</b>          | <b>10</b> | <b>0.9680</b> | <b>0.150</b> | <b>9.4%</b>  | <b>0.9669</b> | <b>0.150</b> | <b>10.1%</b> | <b>3.92</b> |
|            | SIPLS                 | 272                | 10        | 0.9409        | 0.203        | 12.6%        | 0.9636        | 0.157        | 10.6%        | 4.44        |
|            | RF                    | 250                | 10        | 0.9395        | 0.205        | 12.8%        | 0.9715        | 0.139        | 9.4%         | 4.79        |

<sup>1</sup> V. S. M.: Variables Selection Method; <sup>2</sup> V. N.: Variable numbers.

**Table S4.** Performance of different spectral pretreatments models for 4 indexes under non-destructive conditions.

| Analytes   | Pretreatment.        | LVs       | Rc            | RMSEC        | RSEC        | Rp            | RMSEP        | RSEP         | RPD         |
|------------|----------------------|-----------|---------------|--------------|-------------|---------------|--------------|--------------|-------------|
| ANTI-NO    | Raw                  | 10        | 0.9538        | 0.049        | 7.4%        | 0.9509        | 0.053        | 7.4%         | 2.69        |
|            | Normalization        | 10        | 0.9557        | 0.048        | 7.2%        | 0.9499        | 0.054        | 7.5%         | 2.64        |
|            | SNV                  | 9         | 0.9554        | 0.048        | 7.2%        | 0.9529        | 0.049        | 7.3%         | 2.92        |
|            | SG20                 | 11        | 0.9463        | 0.053        | 7.9%        | 0.9512        | 0.049        | 7.4%         | 2.93        |
|            | <b>MSC</b>           | <b>9</b>  | <b>0.9558</b> | <b>0.048</b> | <b>7.2%</b> | <b>0.9529</b> | <b>0.050</b> | <b>7.3%</b>  | <b>2.91</b> |
| Epigotrin  | Raw                  | 12        | 0.9614        | 0.004        | 9.7%        | 0.9285        | 0.004        | 13.7%        | 2.70        |
|            | <b>Normalization</b> | <b>13</b> | <b>0.9619</b> | <b>0.004</b> | <b>9.7%</b> | <b>0.9221</b> | <b>0.005</b> | <b>14.3%</b> | <b>2.67</b> |
|            | SNV                  | 10        | 0.9465        | 0.004        | 11.4%       | 0.9213        | 0.005        | 14.4%        | 2.57        |
|            | SG20                 | 14        | 0.9296        | 0.005        | 13.0%       | 0.9009        | 0.005        | 16.0%        | 2.30        |
|            | MSC                  | 10        | 0.9526        | 0.004        | 10.8%       | 0.9071        | 0.005        | 15.5%        | 2.38        |
| Geniposide | <b>Raw</b>           | <b>10</b> | <b>0.9711</b> | <b>0.364</b> | <b>8.9%</b> | <b>0.9585</b> | <b>0.370</b> | <b>12.3%</b> | <b>3.72</b> |
|            | Normalization        | 10        | 0.9672        | 0.387        | 9.5%        | 0.9624        | 0.429        | 11.7%        | 3.23        |
|            | SNV                  | 8         | 0.9674        | 0.386        | 9.4%        | 0.9663        | 0.428        | 11.1%        | 3.23        |
|            | SG8                  | 11        | 0.9651        | 0.399        | 9.8%        | 0.9642        | 0.512        | 11.4%        | 2.75        |
|            | MSC                  | 8         | 0.9685        | 0.380        | 9.3%        | 0.9662        | 0.407        | 11.1%        | 3.40        |
| Baicalin   | Raw                  | 11        | 0.9686        | 0.153        | 9.6%        | 0.9495        | 0.173        | 11.2%        | 3.55        |
|            | Normalization        | 11        | 0.9550        | 0.182        | 11.5%       | 0.9623        | 0.150        | 9.7%         | 3.97        |
|            | SNV                  | 9         | 0.9710        | 0.147        | 9.3%        | 0.9622        | 0.150        | 9.7%         | 4.11        |
|            | SG5                  | 11        | 0.9517        | 0.189        | 11.9%       | 0.9553        | 0.163        | 10.6%        | 3.71        |
|            | <b>MSC</b>           | <b>10</b> | <b>0.9759</b> | <b>0.134</b> | <b>8.5%</b> | <b>0.9570</b> | <b>0.160</b> | <b>10.4%</b> | <b>3.82</b> |

**Table S5.** Performance of different variable selection models for 4 indexes under non-destructive conditions.

| Analytes   | V. S. M. <sup>1</sup> | V. N. <sup>2</sup> | LVs       | Rc            | RMSEC        | RSEC         | Rp            | RMSEP        | RSEP         | RPD         |
|------------|-----------------------|--------------------|-----------|---------------|--------------|--------------|---------------|--------------|--------------|-------------|
| ANTI-NO    | CARS                  | 50                 | 6         | 0.9440        | 0.054        | 8.1%         | 0.9404        | 0.048        | 8.2%         | 2.99        |
|            | <b>SIPLS</b>          | <b>345</b>         | <b>11</b> | <b>0.9658</b> | <b>0.042</b> | <b>6.4%</b>  | <b>0.9524</b> | <b>0.043</b> | <b>7.3%</b>  | <b>3.49</b> |
|            | RF                    | 50                 | 8         | 0.9671        | 0.041        | 6.2%         | 0.9290        | 0.053        | 8.9%         | 2.78        |
| Epigoitrin | CARS                  | 47                 | 10        | 0.9851        | 0.002        | 6.1%         | 0.9514        | 0.004        | 11.4%        | 3.25        |
|            | <b>SIPLS</b>          | <b>388</b>         | <b>11</b> | <b>0.9409</b> | <b>0.005</b> | <b>12.0%</b> | <b>0.9437</b> | <b>0.004</b> | <b>12.2%</b> | <b>3.10</b> |
|            | RF                    | 110                | 5         | 0.9748        | 0.003        | 7.9%         | 0.8911        | 0.004        | 16.8%        | 3.16        |
| Geniposide | CARS                  | 39                 | 8         | 0.9705        | 0.367        | 9.0%         | 0.9658        | 0.337        | 11.2%        | 4.07        |
|            | <b>SIPLS</b>          | <b>208</b>         | <b>8</b>  | <b>0.9885</b> | <b>0.231</b> | <b>5.6%</b>  | <b>0.9814</b> | <b>0.263</b> | <b>8.3%</b>  | <b>5.29</b> |
|            | RF                    | 80                 | 6         | 0.9790        | 0.311        | 7.6%         | 0.9674        | 0.340        | 10.9%        | 4.06        |
| Baicalin   | <b>CARS</b>           | <b>36</b>          | <b>7</b>  | <b>0.9735</b> | <b>0.141</b> | <b>8.9%</b>  | <b>0.9652</b> | <b>0.144</b> | <b>9.3%</b>  | <b>4.33</b> |
|            | SIPLS                 | 215                | 6         | 0.9485        | 0.195        | 12.3%        | 0.9391        | 0.189        | 12.3%        | 3.24        |
|            | RF                    | 140                | 6         | 0.9616        | 0.169        | 10.6%        | 0.9433        | 0.183        | 11.9%        | 3.34        |

<sup>1</sup> V. S. M.: Variables Selection Method; <sup>2</sup> V. N.: Variable numbers.

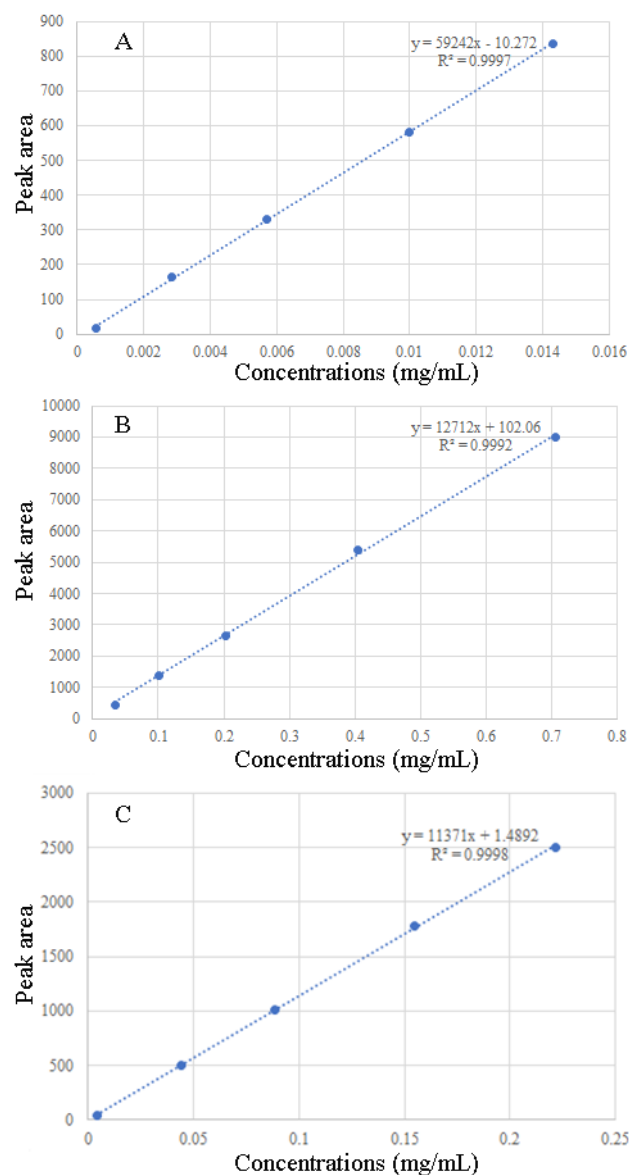**Figure S1.** Concentrations, and standard calibration curves (A) Epigoitrin, (B) Geniposide, (C) Baicalin.
